# Supplementary material for: Cryptosporidium as a testbed for single cell genome characterization of unicellular eukaryotes
Source: Springer Nature journal article supplement (doi:10.1186/s12864-016-2815-y), 2016-06-23

chromosome 1

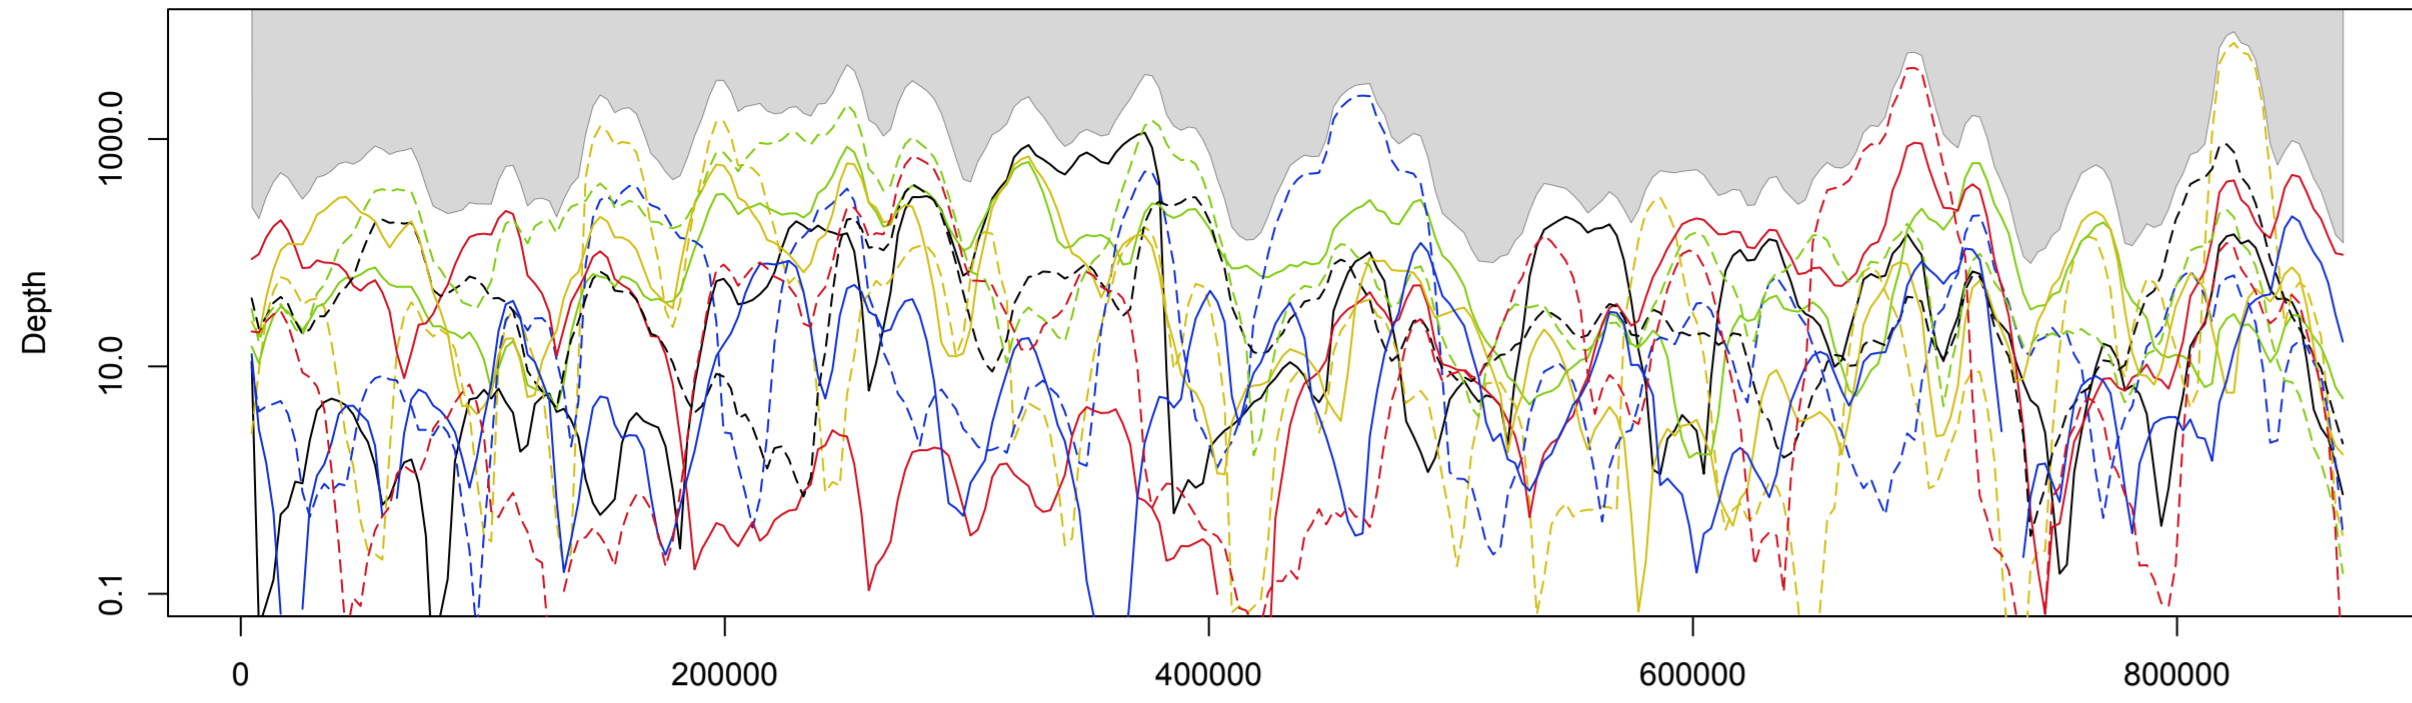

chromosome 5

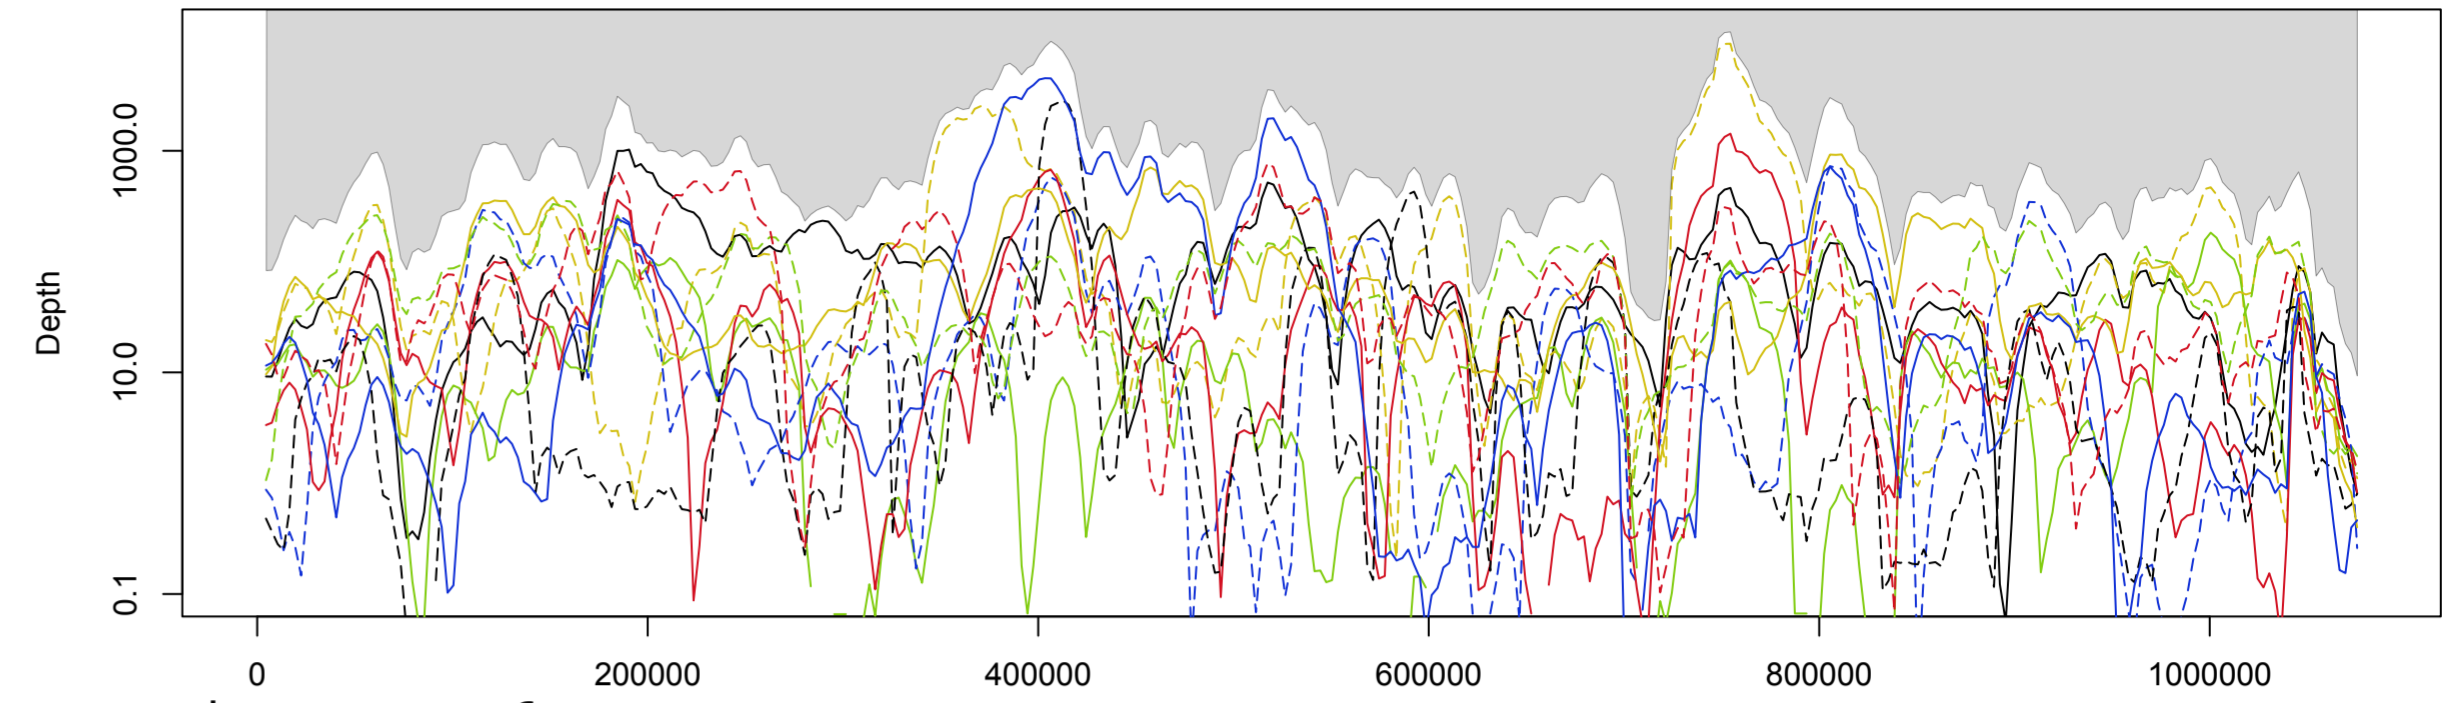

chromosome 2

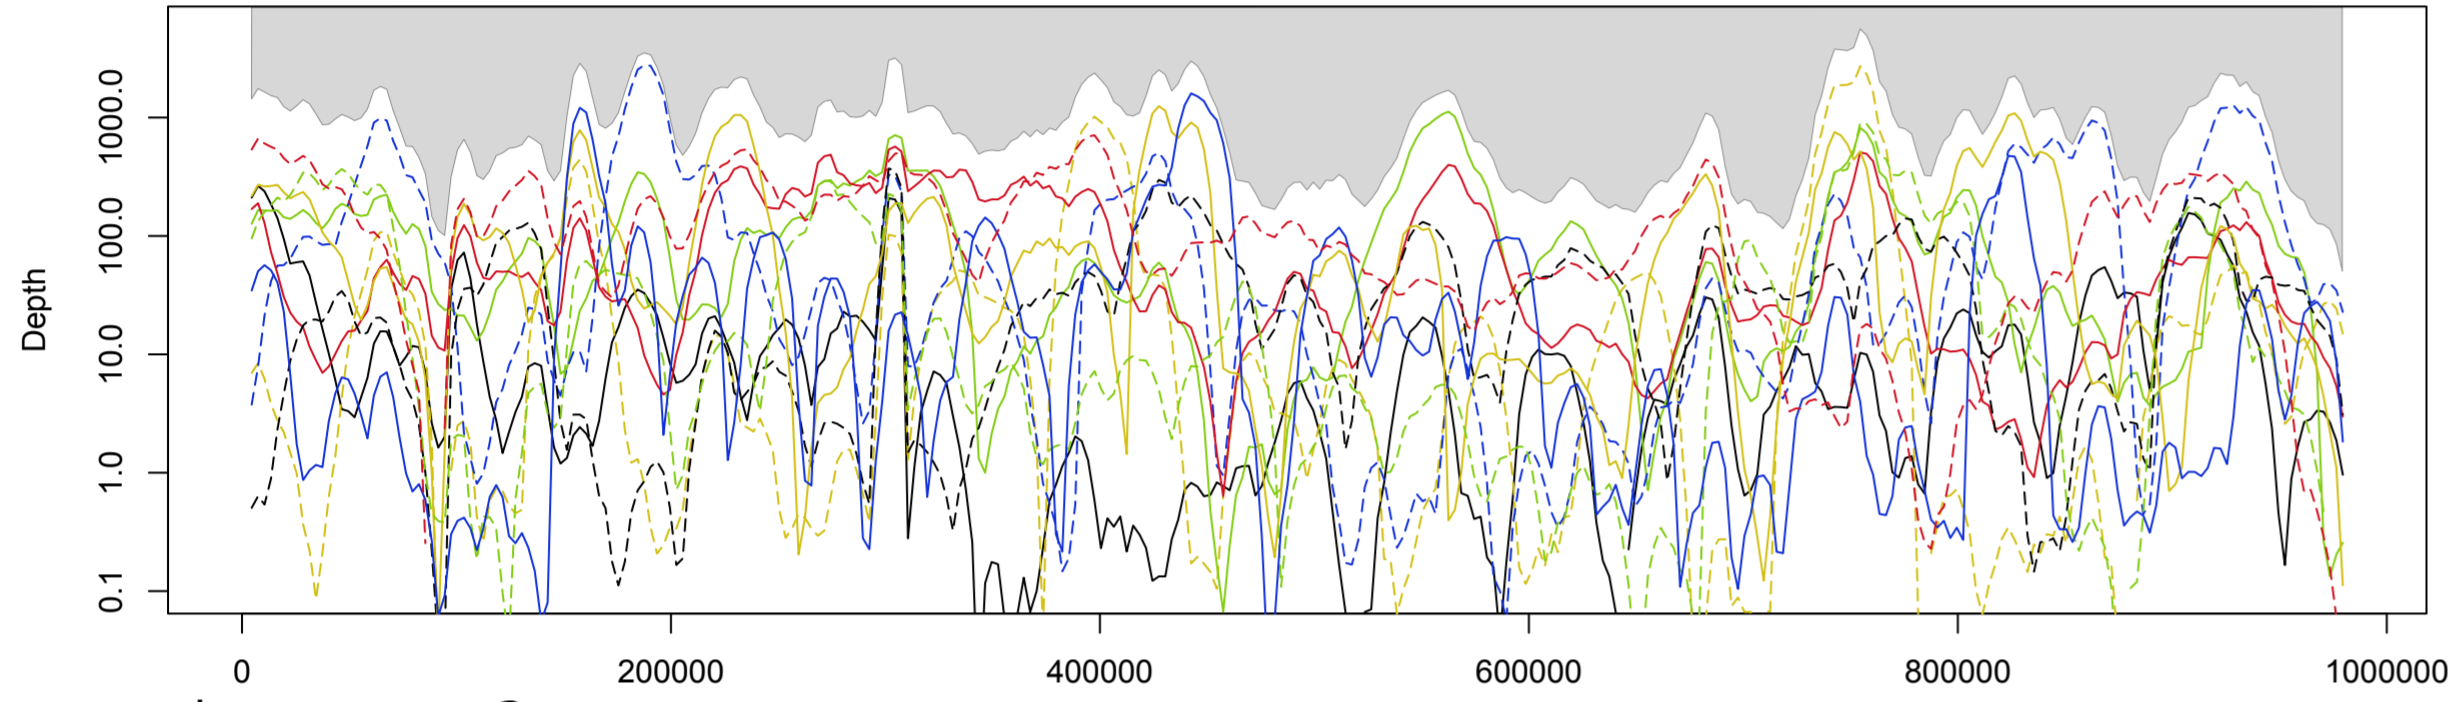

chromosome 6

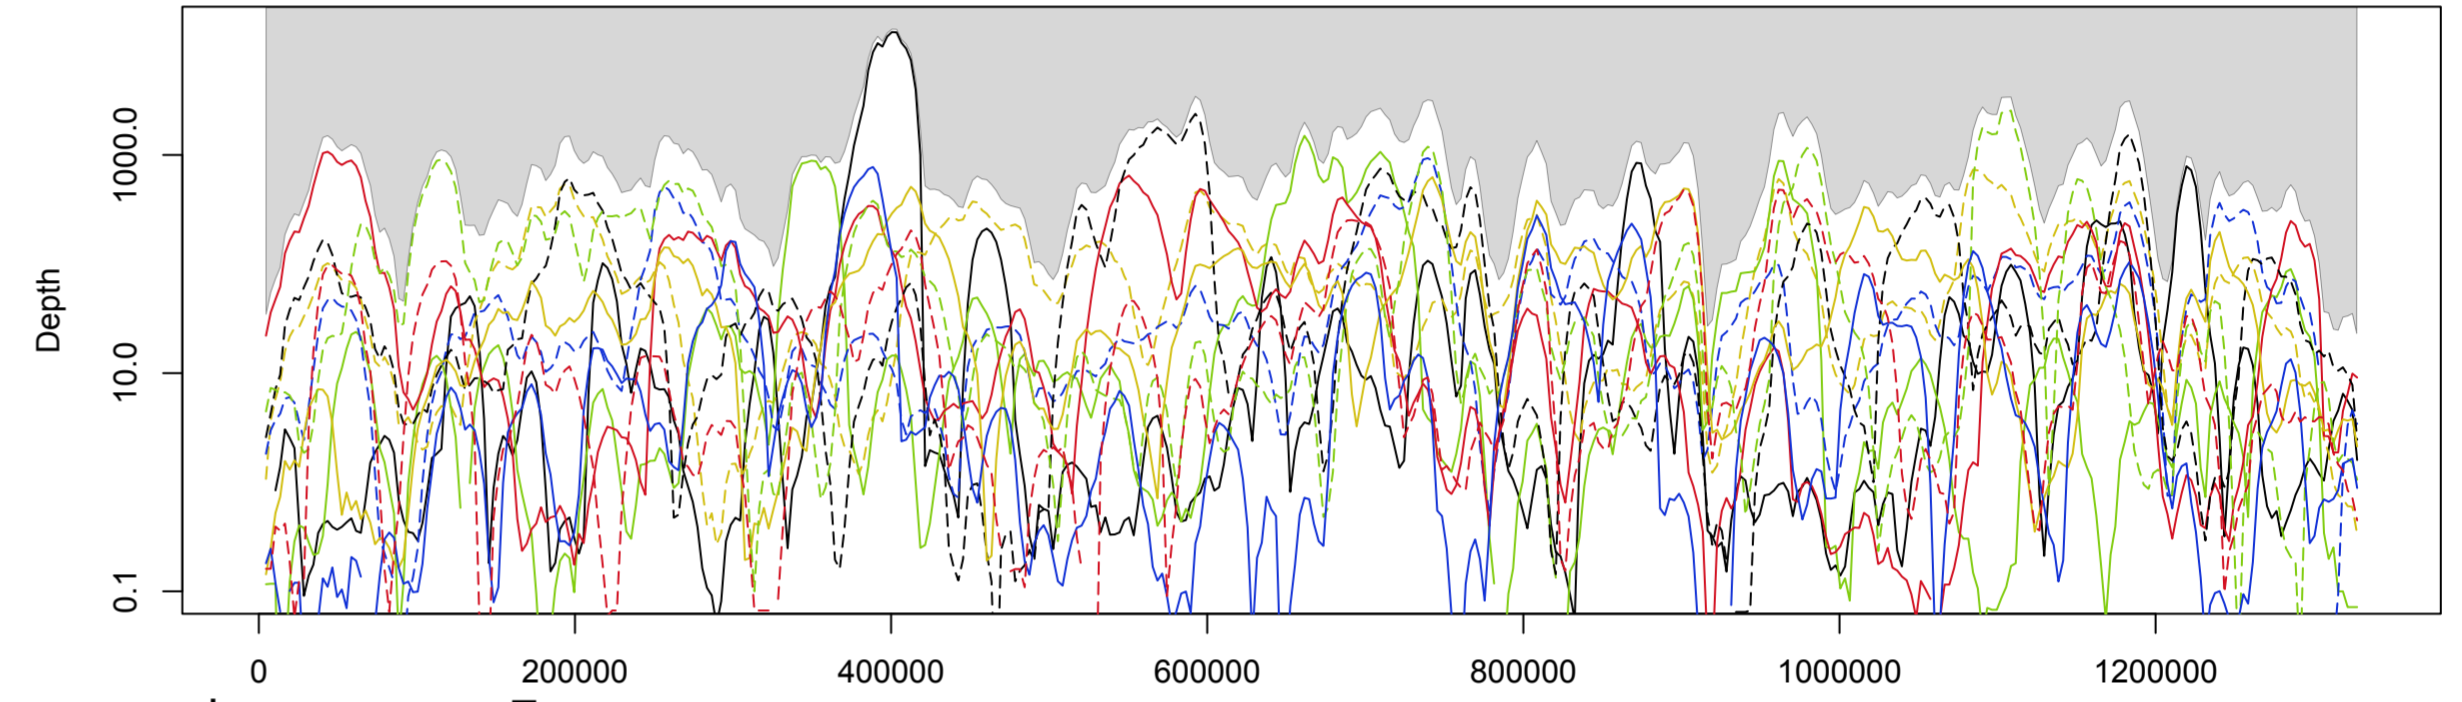

chromosome 3

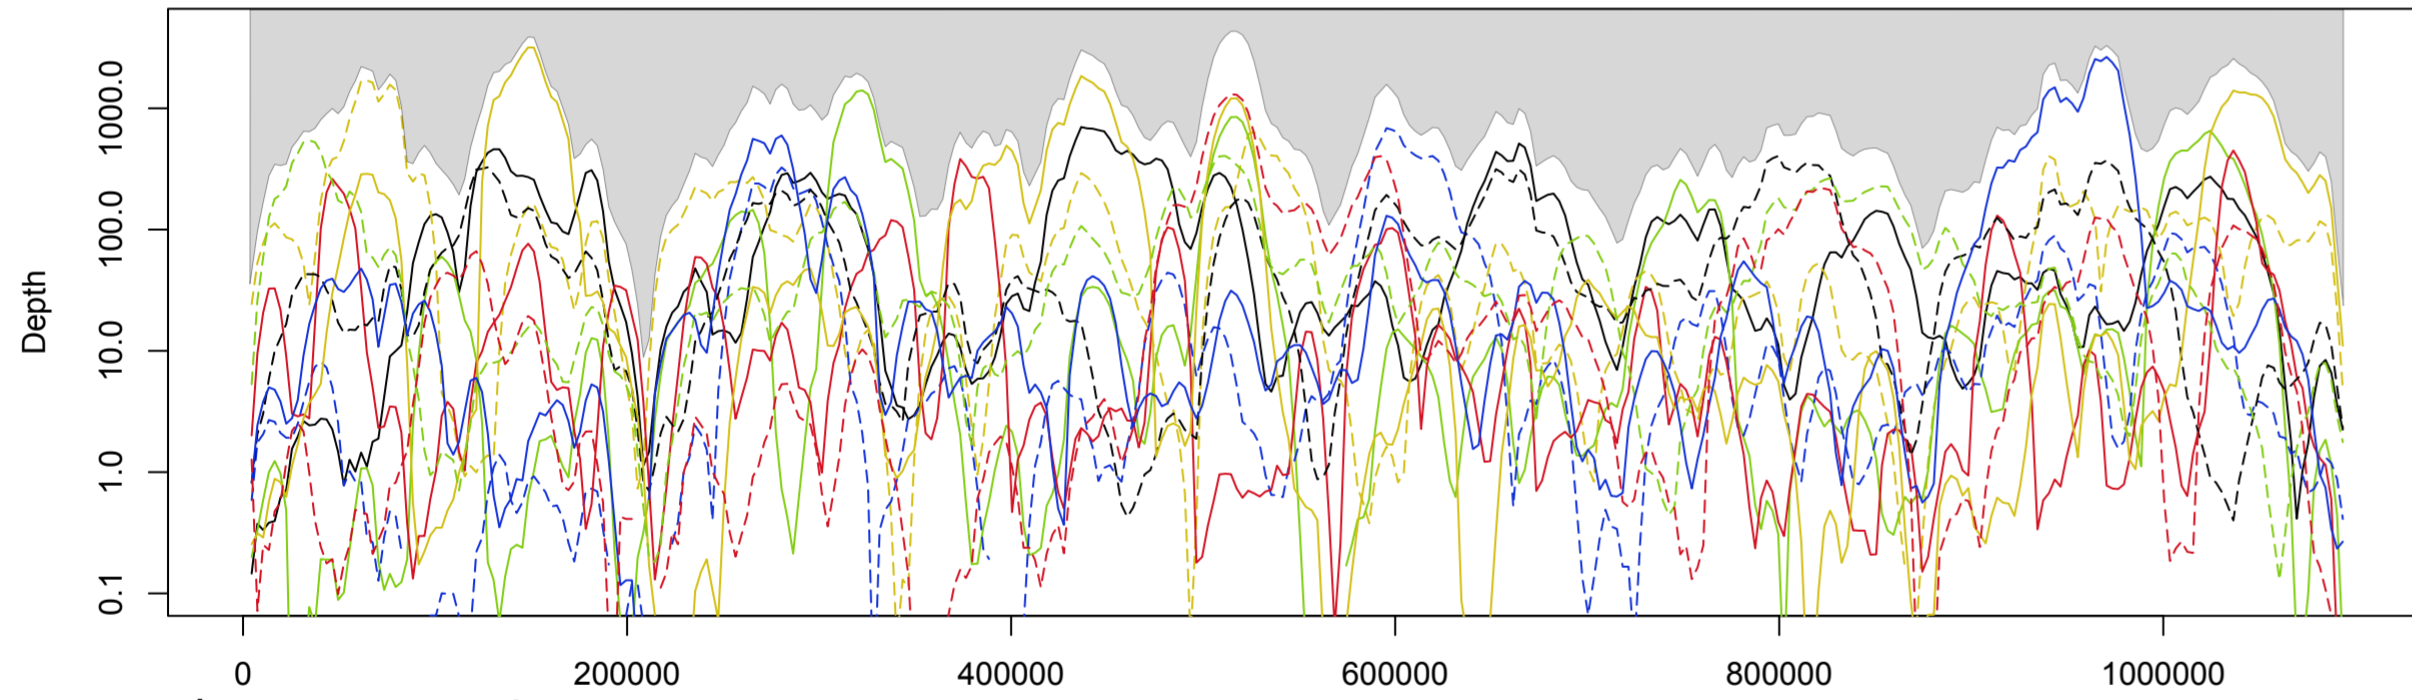

chromosome 7

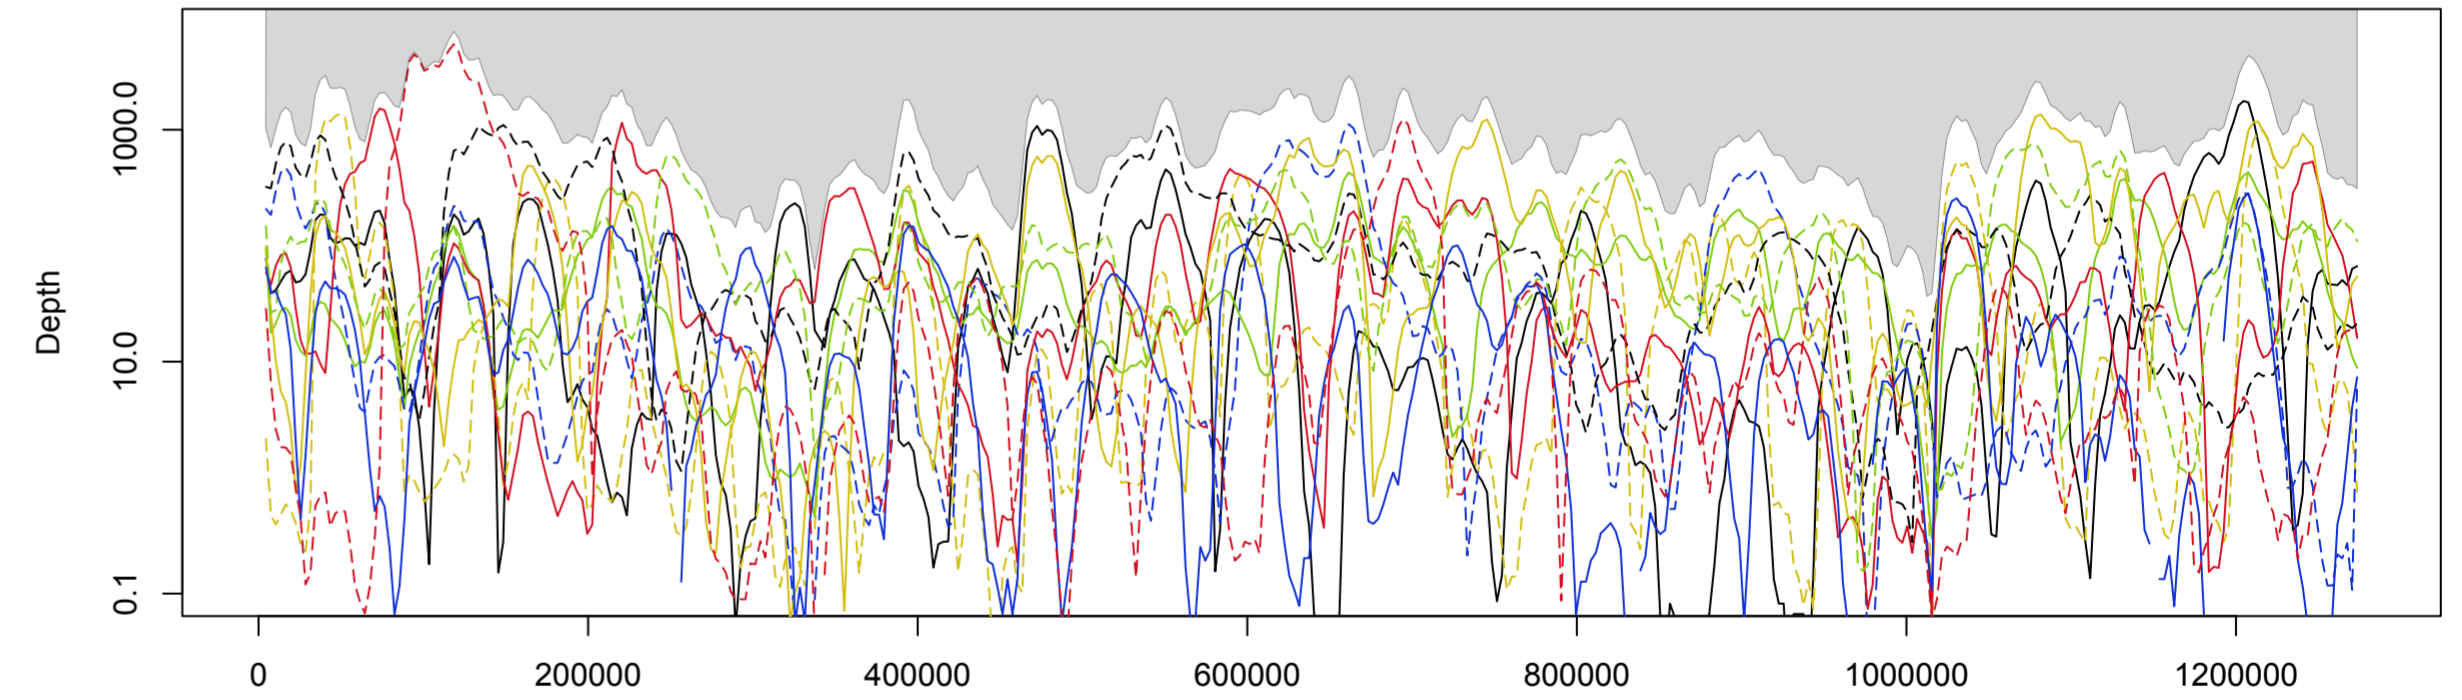

chromosome 4

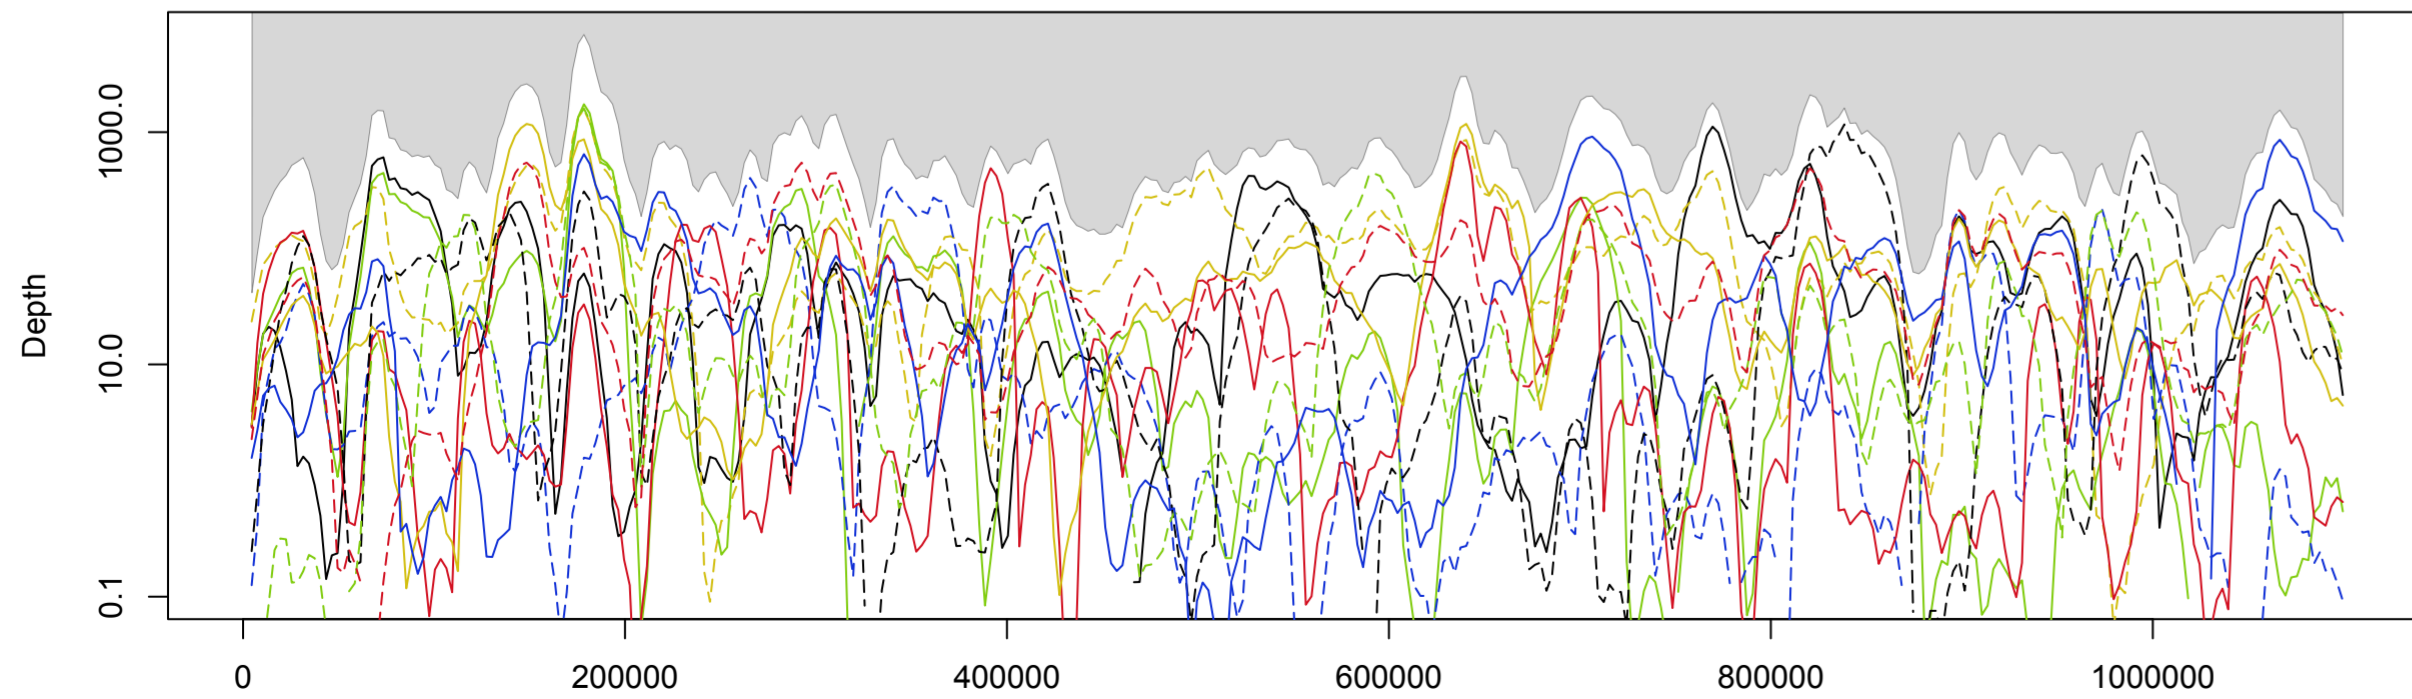

chromosome 8

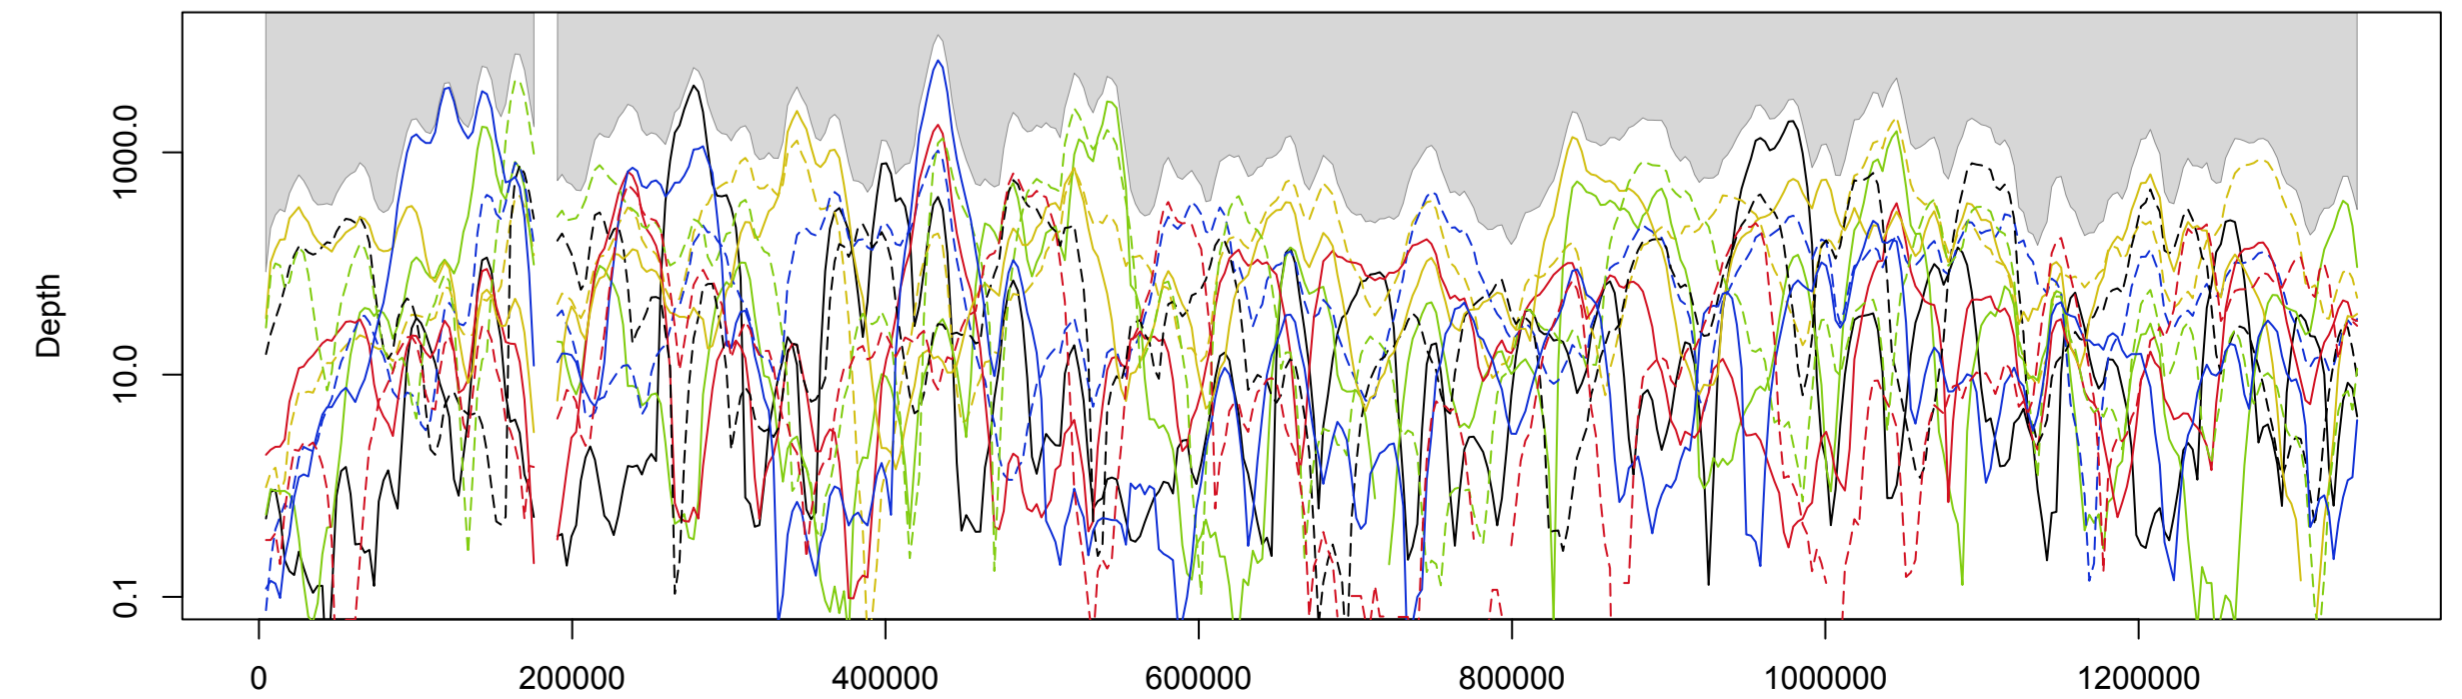

Supplement: 12864_2016_2815_MOESM1_ESM.pdf [file 12864_2016_2815_MOESM1_ESM.pdf]
