# Supplementary material for: Cryptosporidium as a testbed for single cell genome characterization of unicellular eukaryotes
Source: Springer Nature journal article supplement (doi:10.1186/s12864-016-2815-y), 2016-06-23

**A**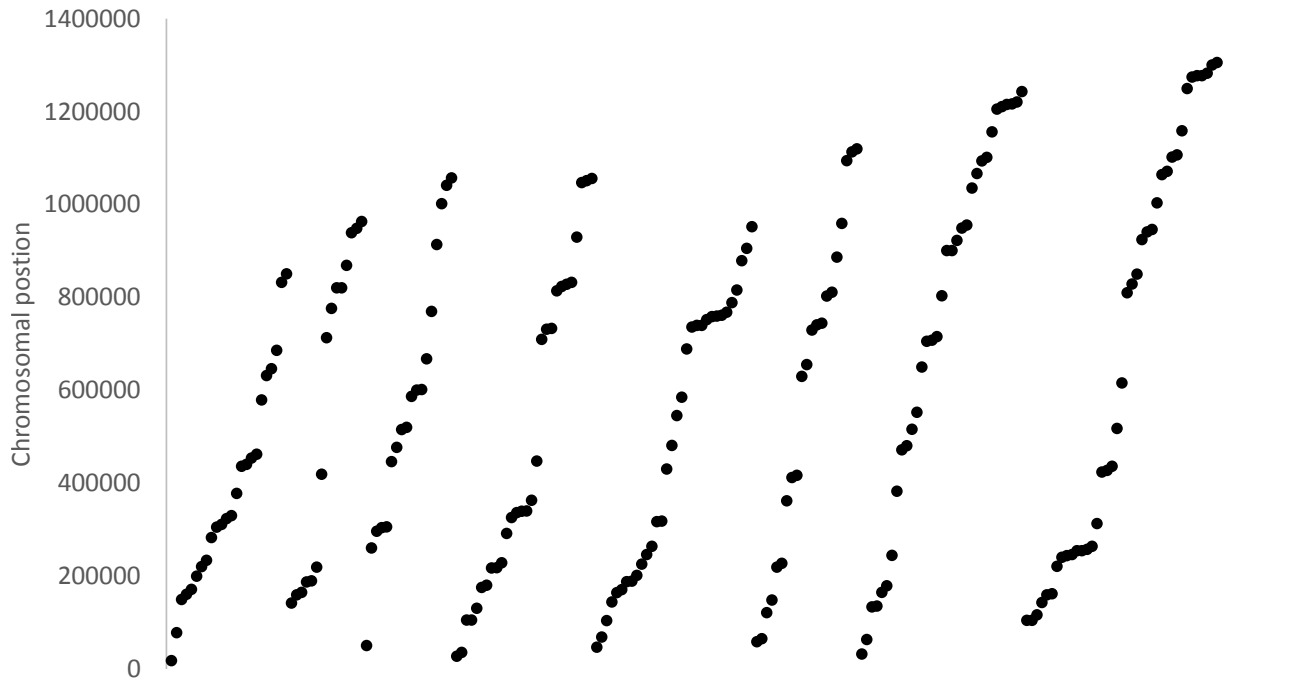**B**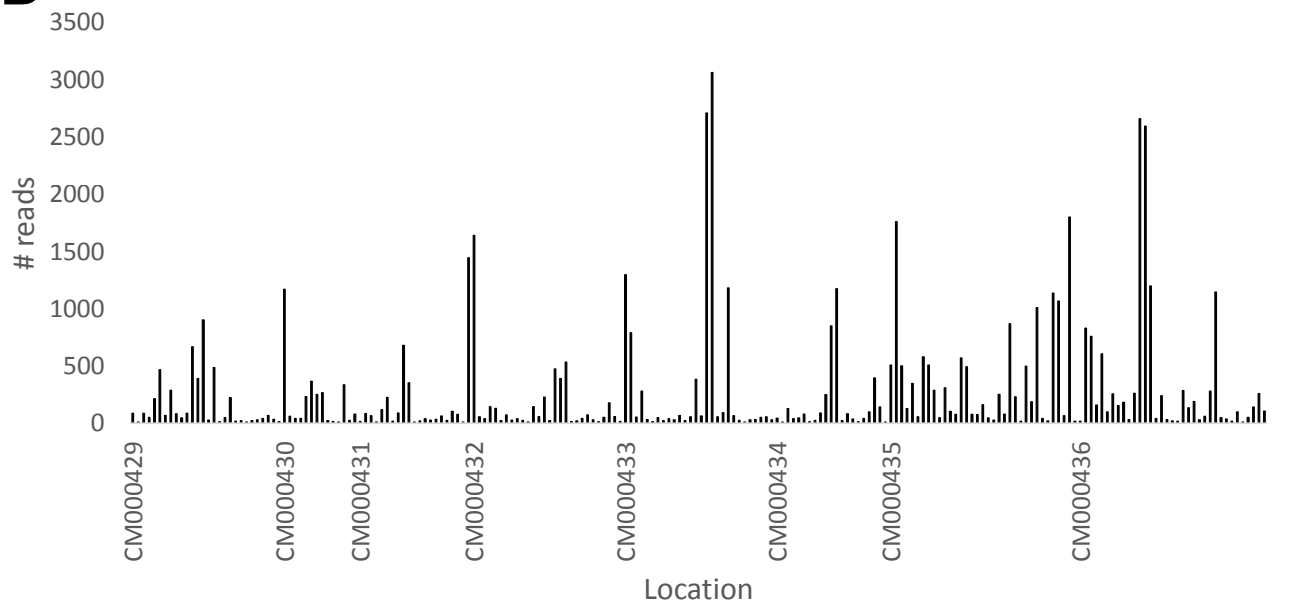

Supplement: 12864_2016_2815_MOESM2_ESM.pdf [file 12864_2016_2815_MOESM2_ESM.pdf]
